# Supplementary material for: Protein crystallisation facilitated by silica particles to compensate for the adverse impact from protein impurities
Source: Royal Society of Chemistry journal article supplement (doi:10.1039/d1ce00983d), 2021-01-01
Supplement: d1ce00983d1.pdf [file d1ce00983d1.pdf]

## Supporting Information

### Protein Crystallisation Facilitated by Silica Particles to Compensate the Adverse Impact from Protein Impurity

*Xiaoyu Li<sup>1</sup> and Jerry Y. Y. Heng<sup>1,\*</sup>*

† Department of Chemical Engineering, Imperial College London, South Kensington  
Campus, London, SW7 2AZ, United Kingdom

\* Corresponding Author: [jerry.heng@imperial.ac.uk](mailto:jerry.heng@imperial.ac.uk)

## Contents

Section S1. Characterisation of Silica Particles

Section S2. Normalised Lysozyme Concentration and Induction Time Determination

## Section S1. Characterisation of Silica Particles

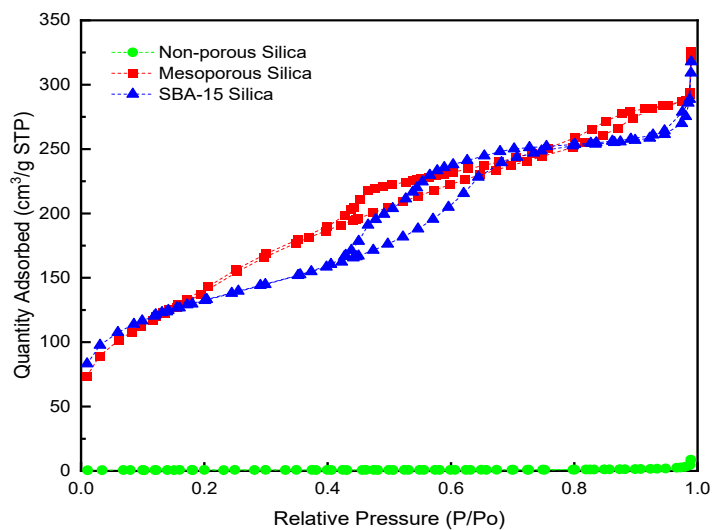

Figure S1: Nitrogen adsorption and desorption isotherms for the silica particles: Non-porous silica (green circle); Mesoporous silica (red square); SBA-15 silica (blue triangle).

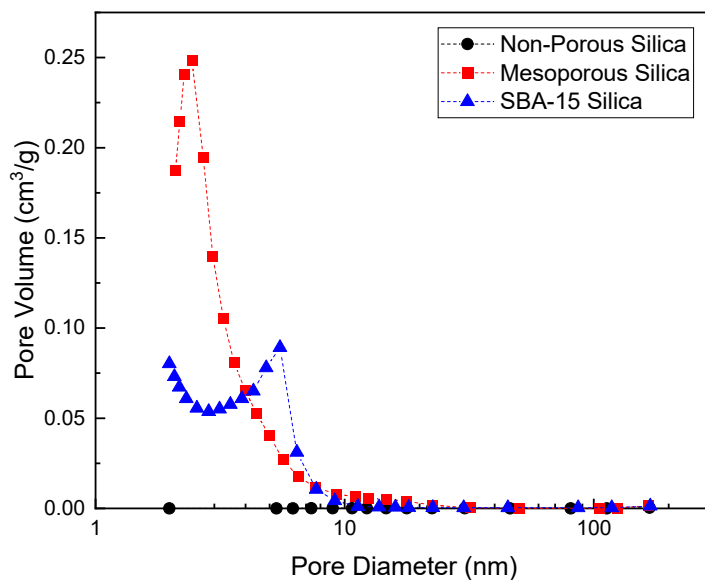

Figure S2: Pore size distribution calculated based on BJH adsorption.

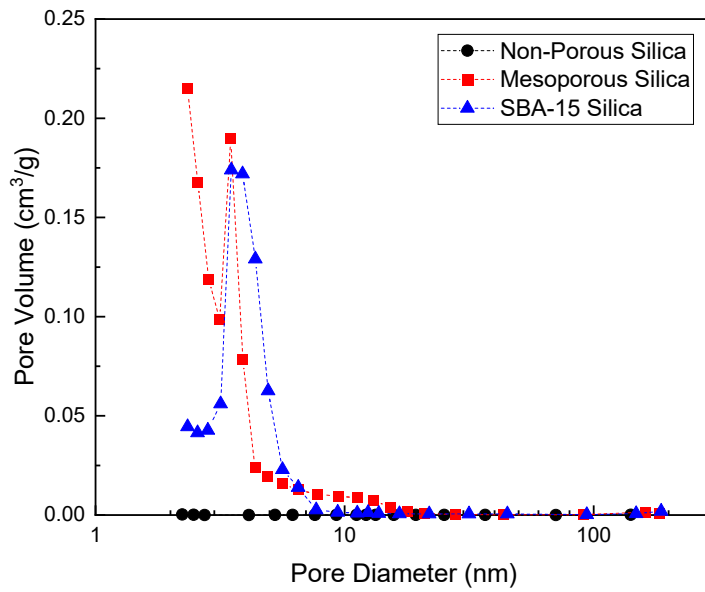

Figure S3: Pore size distribution calculated based on BJH desorption.

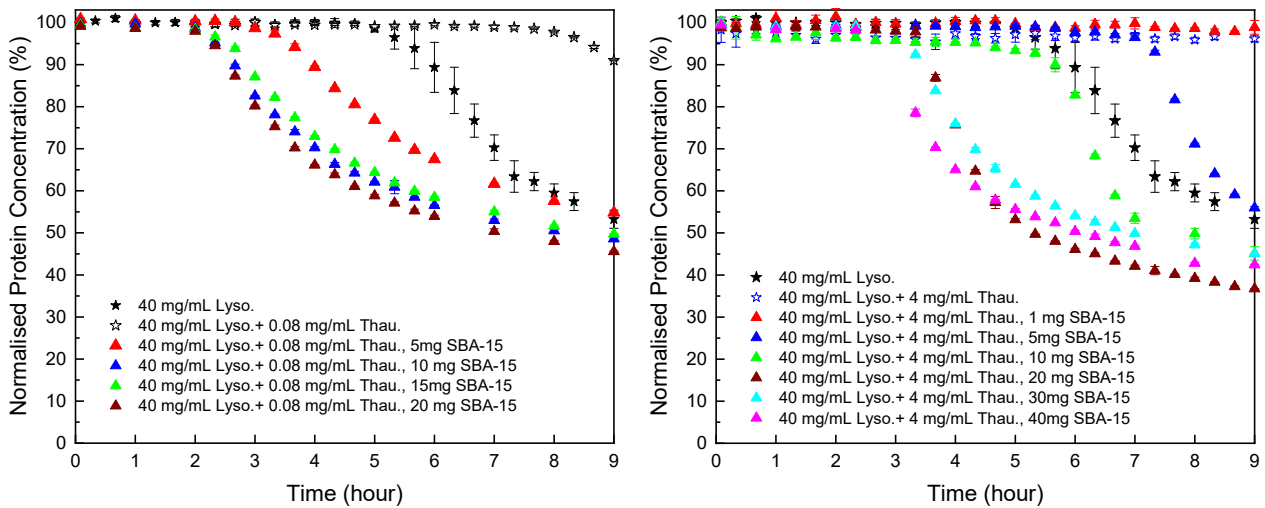

Figure S4: Normalised lysozyme concentration profiles with different amount of thaumatin impurity and silica particle.

## Section S2. Normalised Lysozyme Concentration and Induction Time Determination

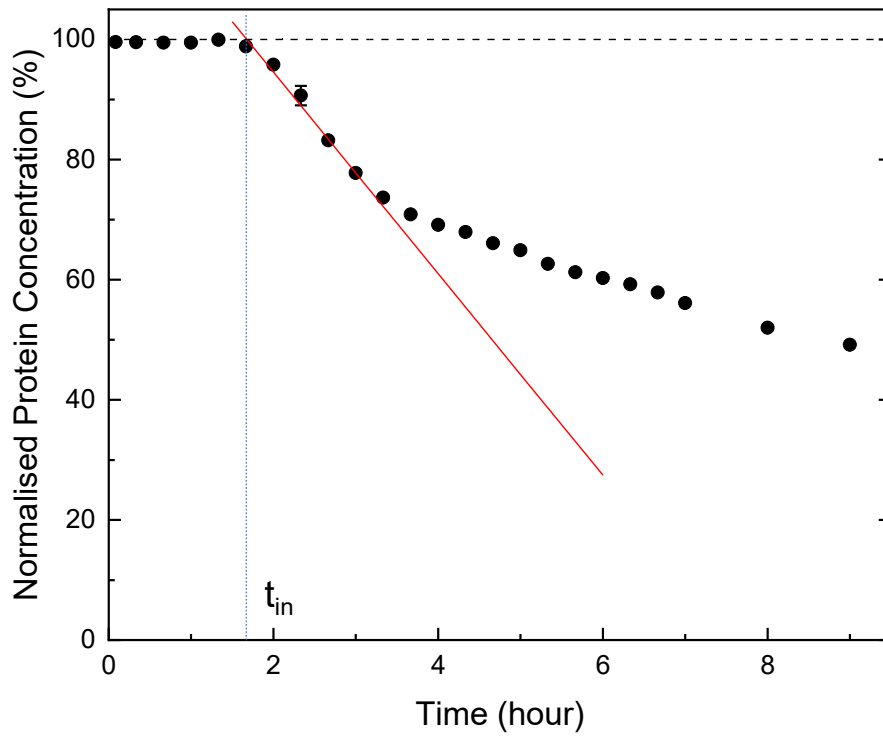

Figure S5: An schematic illustration of protein concentration desupersaturation curve determined by UV-Vis spectrophotometer in protein crystallisation process. induction time determination. The black line represents 100% normalised protein concentration. The red line represents the tangent of the inflection point of the desupersaturation curve. The blue line represents  $x(\text{time})=t_{in}$ , which is the x value of the intercept of the red line and the black line.
